# Supplementary material for: Single-exonuclease nanocircuits reveal the RNA degradation dynamics of PNPase and demonstrate potential for RNA sequencing
Source: PubMed Central journal article supplement (PMC9892577; doi:10.1038/s41467-023-36278-6), 2023-02-01
Supplement: 41467_2023_36278_MOESM3_ESM.pdf [file 41467_2023_36278_MOESM3_ESM.pdf]

## Reporting Summary

Nature Portfolio wishes to improve the reproducibility of the work that we publish. This form provides structure for consistency and transparency in reporting. For further information on Nature Portfolio policies, see our [Editorial Policies](#) and the [Editorial Policy Checklist](#).

### Statistics

For all statistical analyses, confirm that the following items are present in the figure legend, table legend, main text, or Methods section.

n/a Confirmed

- |                                     |                                     |                                                                                                                                                                                                                                                            |
|-------------------------------------|-------------------------------------|------------------------------------------------------------------------------------------------------------------------------------------------------------------------------------------------------------------------------------------------------------|
| <input type="checkbox"/>            | <input checked="" type="checkbox"/> | The exact sample size ( $n$ ) for each experimental group/condition, given as a discrete number and unit of measurement                                                                                                                                    |
| <input type="checkbox"/>            | <input checked="" type="checkbox"/> | A statement on whether measurements were taken from distinct samples or whether the same sample was measured repeatedly                                                                                                                                    |
| <input checked="" type="checkbox"/> | <input type="checkbox"/>            | The statistical test(s) used AND whether they are one- or two-sided<br><i>Only common tests should be described solely by name; describe more complex techniques in the Methods section.</i>                                                               |
| <input type="checkbox"/>            | <input checked="" type="checkbox"/> | A description of all covariates tested                                                                                                                                                                                                                     |
| <input type="checkbox"/>            | <input checked="" type="checkbox"/> | A description of any assumptions or corrections, such as tests of normality and adjustment for multiple comparisons                                                                                                                                        |
| <input type="checkbox"/>            | <input checked="" type="checkbox"/> | A full description of the statistical parameters including central tendency (e.g. means) or other basic estimates (e.g. regression coefficient) AND variation (e.g. standard deviation) or associated estimates of uncertainty (e.g. confidence intervals) |
| <input checked="" type="checkbox"/> | <input type="checkbox"/>            | For null hypothesis testing, the test statistic (e.g. $F$ , $t$ , $r$ ) with confidence intervals, effect sizes, degrees of freedom and $P$ value noted<br><i>Give <math>P</math> values as exact values whenever suitable.</i>                            |
| <input checked="" type="checkbox"/> | <input type="checkbox"/>            | For Bayesian analysis, information on the choice of priors and Markov chain Monte Carlo settings                                                                                                                                                           |
| <input type="checkbox"/>            | <input checked="" type="checkbox"/> | For hierarchical and complex designs, identification of the appropriate level for tests and full reporting of outcomes                                                                                                                                     |
| <input checked="" type="checkbox"/> | <input type="checkbox"/>            | Estimates of effect sizes (e.g. Cohen's $d$ , Pearson's $r$ ), indicating how they were calculated                                                                                                                                                         |

*Our web collection on [statistics for biologists](#) contains articles on many of the points above.*

### Software and code

Policy information about [availability of computer code](#)

Data collection

The I-t curve were sampled by the HF2LI lock-in amplifier at 300 mV bias, 5 kHz bandwidth. The current signal was amplified by a DL1211 amplifier and then recorded by a high-speed acquisition card from NIDAQ at a rate of 57,600 samples per second.

Data analysis

The I-t curves can be analysed by the QuB 2.0.0.32 software. The raw data can be opened by matlab 2019a. The data statistics can be handled with origin 2019b.

For manuscripts utilizing custom algorithms or software that are central to the research but not yet described in published literature, software must be made available to editors and reviewers. We strongly encourage code deposition in a community repository (e.g. GitHub). See the Nature Portfolio [guidelines for submitting code & software](#) for further information.

### Data

Policy information about [availability of data](#)

All manuscripts must include a [data availability statement](#). This statement should provide the following information, where applicable:

- Accession codes, unique identifiers, or web links for publicly available datasets
- A description of any restrictions on data availability
- For clinical datasets or third party data, please ensure that the statement adheres to our [policy](#)

All the databases/datasets used in the study along with appropriately accessible links/accession-codes in the manuscript under the "Data availability" section as well as in this reporting summary. <https://zenodo.org/record/7533205>.

## Human research participants

Policy information about [studies involving human research participants and Sex and Gender in Research](#).

|                             |                                                                                       |
|-----------------------------|---------------------------------------------------------------------------------------|
| Reporting on sex and gender | <input type="text" value="This study does not involve human research participants."/> |
| Population characteristics  | <input type="text" value="See above."/>                                               |
| Recruitment                 | <input type="text" value="Not applicable."/>                                          |
| Ethics oversight            | <input type="text" value="Not applicable."/>                                          |

Note that full information on the approval of the study protocol must also be provided in the manuscript.

## Field-specific reporting

Please select the one below that is the best fit for your research. If you are not sure, read the appropriate sections before making your selection.

Life sciences     Behavioural & social sciences     Ecological, evolutionary & environmental sciences

For a reference copy of the document with all sections, see [nature.com/documents/nr-reporting-summary-flat.pdf](https://www.nature.com/documents/nr-reporting-summary-flat.pdf)

## Ecological, evolutionary & environmental sciences study design

All studies must disclose on these points even when the disclosure is negative.

|                                   |                                                                                                                                                                                                                                                                                                                                                                                                         |
|-----------------------------------|---------------------------------------------------------------------------------------------------------------------------------------------------------------------------------------------------------------------------------------------------------------------------------------------------------------------------------------------------------------------------------------------------------|
| Study description                 | <input type="text" value="We established a point-functionalized silicon nanowire as a biosensor for real-time sampling of RNA degradation dynamics at single-molecule resolution."/>                                                                                                                                                                                                                    |
| Research sample                   | <input type="text" value="A single intrinsically PNPase obtained from E.coli cell was covalently conjugated to the silicon nanowire through chemical engineering, and its conformational transition dynamics was characterized as current fluctuations. PNPase was chosen for the research by the trait that it has the step-by- step degradation capacity and appropriate time-scale compatibility."/> |
| Sampling strategy                 | <input type="text" value="An in-situ real-time electrical single-molecule detection which has the capability of single-event tracking. Sampling apparatus equipped with 17us temporal resolution enable us recording the detailed dynamic behavior of a single PNPase (millisecond spatial scale) in 20 s."/>                                                                                           |
| Data collection                   | <input type="text" value="The current signal of the SiNW loop was amplified by a DL1211 amplifier and collected by Zurich instruments to the hard disk of the computer by Zhiheng Yang."/>                                                                                                                                                                                                              |
| Timing and spatial scale          | <input type="text" value="The current signal recorded by a high-speed acquisition card from NIDAQ at a rate of 57,600 samples per second, which can record the detailed biological behavior of a single PNPase in 20 s. The samples were detected in 1-2 days, considering the biologically active property."/>                                                                                         |
| Data exclusions                   | <input type="text" value="No data are excluded from the analyses."/>                                                                                                                                                                                                                                                                                                                                    |
| Reproducibility                   | <input type="text" value="Although values of the current levels varied from read to read among different SiNW-FET devices, the current conversion patterns and the dependence of the testing conditions were highly reproducible. The data was collected from three different devices to confirm the reproducibility."/>                                                                                |
| Randomization                     | <input type="text" value="The samples were obtained with ultra-high purity to avoid the experimental randomization error."/>                                                                                                                                                                                                                                                                            |
| Blinding                          | <input type="text" value="The experiments were proceeded by all the members in our team without blinding operation."/>                                                                                                                                                                                                                                                                                  |
| Did the study involve field work? | <input type="checkbox"/> Yes <input checked="" type="checkbox"/> No                                                                                                                                                                                                                                                                                                                                     |

## Reporting for specific materials, systems and methods

We require information from authors about some types of materials, experimental systems and methods used in many studies. Here, indicate whether each material, system or method listed is relevant to your study. If you are not sure if a list item applies to your research, read the appropriate section before selecting a response.

## Materials & experimental systems

| n/a                                 | Involvement in the study                               |
|-------------------------------------|--------------------------------------------------------|
| <input checked="" type="checkbox"/> | <input type="checkbox"/> Antibodies                    |
| <input checked="" type="checkbox"/> | <input type="checkbox"/> Eukaryotic cell lines         |
| <input checked="" type="checkbox"/> | <input type="checkbox"/> Palaeontology and archaeology |
| <input checked="" type="checkbox"/> | <input type="checkbox"/> Animals and other organisms   |
| <input checked="" type="checkbox"/> | <input type="checkbox"/> Clinical data                 |
| <input checked="" type="checkbox"/> | <input type="checkbox"/> Dual use research of concern  |

## Methods

| n/a                                 | Involvement in the study                        |
|-------------------------------------|-------------------------------------------------|
| <input checked="" type="checkbox"/> | <input type="checkbox"/> ChIP-seq               |
| <input checked="" type="checkbox"/> | <input type="checkbox"/> Flow cytometry         |
| <input checked="" type="checkbox"/> | <input type="checkbox"/> MRI-based neuroimaging |
